# Supplementary material
Source: Royal Society of Chemistry journal article supplement (doi:10.1039/d6ta02463g)
Supplement: d6ta02463g1.pdf [file d6ta02463g1.pdf]

SUPPLEMENTARY INFORMATION (SI)

**Potential-dependent NRR/HER competition and N<sub>2</sub> activation**

**mechanism in M1M2@C<sub>6</sub>N<sub>6</sub> bimetallic catalysts**

Lintao Xu<sup>1</sup>, Yuhong Huang<sup>1,3,\*</sup>, Ruhai Du<sup>1</sup>, Haiping Lin<sup>1,3</sup>, Han Xie<sup>1</sup>, Baiyan

Zhou<sup>1</sup>, Fei Ma<sup>2,3,\*</sup>, Xiumei Wei<sup>1,3</sup>

<sup>1</sup> *School of Physics & Information Technology, Shaanxi Normal University, Xi'an 710119,*

*Shaanxi, China*

<sup>2</sup> *State Key Laboratory for Mechanical Behavior of Materials, Xi'an Jiaotong University,*

*Xi'an 710049, Shaanxi, China*

<sup>3</sup> *Shaanxi "Four Bodies and One Union" University-Enterprise Joint Research Center for*

*Advanced Molybdenum-based Functional Materials, Xi'an 710119, Shaanxi, China*

---

\*Corresponding authors. Tel.: +86 29 81530750, E-mail: huangyh@snnu.edu.cn (Y.H. Huang),

+86 29 82668610, E-mail: mafei@mail.xjtu.edu.cn (F. Ma).

**Table S1** The  $\Delta G^*_{N_2}$ ,  $\Delta G^*_{N_2^- * N_2H}$  and  $\Delta G^*_{NH_2^- * NH_3}$  values of 55 M1M2@C<sub>6</sub>N<sub>6</sub> DACs.

| M1M2 | $\Delta G^*_{N_2-end}$<br>(eV) | $\Delta G^*_{N_2-side}$<br>(eV) | $\Delta G^*_{N_2^- * N_2H-end}$<br>(eV) | $\Delta G^*_{N_2^- * HN_2-side}$<br>(eV) | $\Delta G^*_{N_2^- * N_2H-side}$<br>(eV) | $\Delta G^*_{NH_2^- * NH_3}$<br>(eV) |
|------|--------------------------------|---------------------------------|-----------------------------------------|------------------------------------------|------------------------------------------|--------------------------------------|
| ScSc | /                              | -1.00                           | /                                       | -0.25                                    | 0.89                                     | 1.28                                 |
| ScTi | /                              | -1.00                           | /                                       | -0.70                                    | 0.72                                     | 1.28                                 |
| ScV  | -0.88                          | /                               | -0.26                                   | /                                        | /                                        | 0.23                                 |
| ScCr | -0.05                          | /                               | 0.58                                    | /                                        | /                                        | 0.39                                 |
| ScMn | -0.39                          | /                               | 0.70                                    | /                                        | /                                        | 0.54                                 |
| ScFe | -0.72                          | /                               | 0.80                                    | /                                        | /                                        | 0.71                                 |
| ScCo | -1.14                          | /                               | 0.50                                    | /                                        | /                                        | 0.56                                 |
| ScNi | -0.82                          | /                               | 0.76                                    | /                                        | /                                        | 0.73                                 |
| ScMo | -0.45                          | /                               | 0.96                                    | /                                        | /                                        | 0.48                                 |
| ScW  | /                              | -1.01                           | /                                       | -0.50                                    | 1.18                                     | 0.81                                 |
| TiTi | /                              | -0.83                           | /                                       | -0.08                                    | 0.93                                     | 0.82                                 |
| TiV  | -0.47                          | /                               | -0.05                                   | /                                        | /                                        | 0.62                                 |
| TiCr | -0.34                          | /                               | 1.07                                    | /                                        | /                                        | 0.48                                 |
| TiMn | 0.09                           | -0.05                           | /                                       | 0.01                                     | 0.36                                     | 0.87                                 |
| TiFe | -0.64                          | -0.59                           | 0.33                                    | 0.31                                     | 0.62                                     | 1.09                                 |
| TiCo | -0.21                          | -0.22                           | 0.32                                    | 0.50                                     | 0.53                                     | 0.71                                 |
| TiNi | -0.49                          | -0.11                           | 0.90                                    | -0.05                                    | 0.41                                     | 0.17                                 |
| TiMo | 0.08                           | /                               | /                                       | /                                        | /                                        | /                                    |
| TiW  | -0.51                          | -0.61                           | 0.50                                    | -0.18                                    | -0.01                                    | 0.86                                 |
| VV   | -0.06                          | 0.35                            | 1.32                                    | /                                        | /                                        | 0.35                                 |
| VCr  | 0.00                           | /                               | 1.06                                    | /                                        | /                                        | 0.48                                 |
| VMn  | /                              | /                               | /                                       | /                                        | /                                        | /                                    |
| VFe  | -0.27                          | -0.18                           | 0.31                                    | 0.53                                     | 0.62                                     | 0.44                                 |
| VCo  | -0.44                          | -0.08                           | 0.83                                    | 0.49                                     | 0.34                                     | 0.36                                 |
| VNi  | -0.47                          | -0.13                           | 0.58                                    | 0.52                                     | 0.48                                     | 0.31                                 |
| VMo  | 0.39                           | /                               | /                                       | /                                        | /                                        | /                                    |
| VW   | -0.18                          | -0.17                           | 0.60                                    | 0.07                                     | 0.14                                     | 0.83                                 |
| CrCr | -1.36                          | -1.23                           | 0.59                                    | 0.30                                     | 0.31                                     | 0.94                                 |
| CrMn | -1.17                          | -1.08                           | 0.66                                    | 0.45                                     | 0.95                                     | 0.88                                 |
| CrFe | -0.30                          | -0.17                           | 0.57                                    | 0.02                                     | 0.54                                     | 0.62                                 |
| CrCo | -0.68                          | -0.53                           | 0.68                                    | 0.68                                     | 0.91                                     | 0.91                                 |
| CrNi | -0.16                          | /                               | 0.59                                    | /                                        | /                                        | 0.64                                 |
| CrMo | 0.35                           | /                               | /                                       | /                                        | /                                        | /                                    |
| CrW  | -0.31                          | 0.10                            | 0.06                                    | /                                        | /                                        | 0.86                                 |
| MnMn | -0.85                          | -0.62                           | 0.51                                    | 0.54                                     | 0.87                                     | 0.84                                 |

|      |       |       |       |      |      |       |
|------|-------|-------|-------|------|------|-------|
| MnFe | -0.72 | 0.04  | 0.65  | /    | /    | 0.80  |
| MnCo | -0.53 | -0.27 | 0.73  | 0.91 | 0.86 | 0.48  |
| MnNi | 0.06  | /     | /     | /    | /    | /     |
| MnMo | 0.07  | /     | /     | /    | /    | /     |
| MnW  | -0.10 | /     | 1.09  | /    | /    | 1.30  |
| FeFe | -0.46 | /     | 0.49  | /    | /    | 0.57  |
| FeCo | -0.30 | -0.00 | 0.31  | 0.73 | 0.75 | 0.71  |
| FeNi | -0.21 | 0.36  | 0.75  | /    | /    | 0.89  |
| FeMo | -0.15 | /     | 1.15  | /    | /    | 0.62  |
| FeW  | -0.57 | 0.01  | 0.53  | /    | /    | 0.44  |
| CoCo | -0.76 | -0.51 | 0.68  | 1.04 | 1.05 | 0.87  |
| CoNi | -0.29 | 0.13  | 0.89  | /    | /    | 0.37  |
| CoMo | -0.32 | -0.02 | 1.22  | 0.04 | 0.12 | -0.12 |
| CoW  | -0.72 | -0.19 | 0.94  | 0.24 | 0.38 | 0.49  |
| NiNi | 0.42  | /     | /     | /    | /    | /     |
| NiMo | -0.94 | -0.14 | 0.84  | 0.21 | 0.10 | 0.04  |
| NiW  | -1.12 | -0.38 | 0.55  | 0.16 | 0.38 | 0.48  |
| MoMo | 0.73  | 0.69  | /     | /    | /    | /     |
| MoW  | -0.05 | /     | -0.18 | /    | /    | 0.58  |
| WW   | -0.48 | -0.30 | 0.49  | 0.04 | 0.02 | 0.31  |

**Table S2** Fitted parameters of the potential-dependent free energy (with the form  $E = aU^2 + bU + c$  and  $E = -\frac{1}{2}C(U-U_{PZC})^2 + E_{PZC}$ , respectively.) for M1M2@C<sub>6</sub>N<sub>6</sub>.  $U_{PZC}$  (V/SHE) and  $C$  (e/V) are the potential of zero charge (PZC) and capacitance of the corresponding system, respectively, and  $E_{PZC}$  (eV) is the energy of the system at the PZC.

| Species               | a     | b     | c       | C    | $U_{PZC}$ | $E_{PZC}$ |
|-----------------------|-------|-------|---------|------|-----------|-----------|
| ScV                   | -1.16 | -1.61 | -428.13 | 2.31 | -0.70     | -427.57   |
| *N <sub>2</sub> -ScV  | -1.19 | -1.99 | -446.00 | 2.39 | -0.83     | -445.17   |
| *H-ScV                | -1.08 | -1.30 | -432.51 | 2.16 | -0.60     | -432.12   |
| ScMn                  | -1.11 | -0.05 | -427.43 | 2.22 | -0.02     | -427.43   |
| *N <sub>2</sub> -ScMn | -1.14 | -0.48 | -445.95 | 2.29 | -0.21     | -445.90   |
| *H-ScMn               | -0.92 | -0.07 | -431.26 | 1.83 | -0.04     | -431.25   |

|                                      |       |       |         |      |       |         |
|--------------------------------------|-------|-------|---------|------|-------|---------|
| *N <sub>2</sub> H-ScMn               | -1.06 | -0.46 | -448.96 | 2.11 | -0.21 | -448.91 |
| *N <sub>2</sub> H <sub>2</sub> -ScMn | -1.14 | -0.94 | -452.75 | 2.29 | -0.41 | -452.56 |
| *N-ScMn                              | -1.03 | -0.31 | -436.80 | 2.07 | -0.15 | -436.78 |
| *NH-ScMn                             | -1.12 | -0.60 | -440.95 | 2.23 | -0.27 | -440.87 |
| *NH <sub>2</sub> -ScMn               | -1.14 | -0.79 | -445.34 | 2.28 | -0.35 | -445.20 |
| *NH <sub>3</sub> -ScMn               | -1.10 | -1.11 | -449.06 | 2.20 | -0.50 | -448.78 |
| ScCo                                 | -1.14 | -0.41 | -425.50 | 2.29 | -0.18 | -425.46 |
| *N <sub>2</sub> -ScCo                | -1.11 | -0.45 | -444.13 | 2.22 | -0.20 | -444.08 |
| *H-ScCo                              | -1.17 | -0.45 | -430.47 | 2.34 | -0.19 | -430.43 |
| VFe                                  | -1.17 | -0.19 | -427.57 | 2.35 | -0.08 | -427.56 |
| *N <sub>2</sub> -VFe                 | -1.14 | 0.04  | -444.69 | 2.27 | 0.02  | -444.68 |
| *H-VFe                               | -1.14 | 0.07  | -431.01 | 2.27 | 0.03  | -431.01 |
| *N <sub>2</sub> H-VFe                | -1.14 | 0.00  | -448.00 | 2.28 | 0.00  | -448.00 |
| *N <sub>2</sub> H <sub>2</sub> -VFe  | -1.05 | -0.35 | -451.90 | 2.10 | -0.17 | -451.87 |
| *N-VFe                               | -1.10 | 0.03  | -436.16 | 2.21 | 0.01  | -436.16 |
| *NH-VFe                              | -1.10 | -0.22 | -440.25 | 2.21 | -0.10 | -440.24 |
| *NH <sub>2</sub> -VFe                | -1.11 | -0.30 | -444.47 | 2.22 | -0.14 | -444.45 |
| *NH <sub>3</sub> -VFe                | -1.06 | -0.64 | -447.96 | 2.13 | -0.30 | -447.86 |
| VNi                                  | -1.38 | -2.67 | -425.57 | 2.76 | -0.97 | -424.28 |
| *N <sub>2</sub> -VNi                 | -1.07 | -2.35 | -443.09 | 2.14 | -1.10 | -441.81 |
| *H-VNi                               | -1.06 | -1.97 | -429.35 | 2.12 | -0.93 | -428.44 |
| FeW                                  | -1.03 | -2.27 | -430.67 | 2.06 | -1.10 | -429.42 |

|                      |       |       |         |      |       |         |
|----------------------|-------|-------|---------|------|-------|---------|
| *N <sub>2</sub> -FeW | -1.05 | -2.28 | -448.39 | 2.09 | -1.09 | -447.14 |
| *H-FeW               | -0.95 | -1.82 | -434.49 | 1.89 | -0.96 | -433.62 |
| NiW                  | -1.04 | -2.39 | -427.52 | 2.08 | -1.15 | -426.14 |
| *N <sub>2</sub> -NiW | -0.92 | -1.98 | -445.22 | 1.85 | -1.07 | -444.16 |
| *H-NiW               | -0.88 | -1.57 | -431.24 | 1.76 | -0.89 | -430.54 |
| WW                   | -1.44 | -2.75 | -434.80 | 2.88 | -0.95 | -433.49 |
| *N <sub>2</sub> -WW  | -1.26 | -2.45 | -452.61 | 2.52 | -0.98 | -451.41 |
| *H-WW                | -1.03 | -1.97 | -438.83 | 2.06 | -0.96 | -437.89 |

**Table S3** The feature names and their corresponding symbols of the original feature set.

| feature                                                  | symbol       |
|----------------------------------------------------------|--------------|
| The interatomic distance between M1 and M2               | $d_{M1M2}$   |
| The atomic number of M1                                  | $Z_{M1}$     |
| The atomic radius of M1                                  | $R_{M1}$     |
| The first ionization energy of M1                        | $I_{M1}$     |
| The pauling electronegativity of M1                      | $\chi_{M1}$  |
| Unpaired d-electron number of M1                         | $N_{ied,M1}$ |
| The covalent radius of M1                                | $R_{COV,M1}$ |
| The number of outermost d electrons of M1                | $N_{d,M1}$   |
| The electron affinity of M1                              | $E_{A,M1}$   |
| The relative atomic mass of M1                           | $M_{M1}$     |
| The oxide formation enthalpy of M1                       | $H_{f,oxM1}$ |
| Average distance between M1 and the coordinating N atoms | $d_{M1-N}$   |
| The atomic number of M2                                  | $Z_{M2}$     |
| The atomic radius of M2                                  | $R_{M2}$     |
| The first ionization energy of M2                        | $I_{M2}$     |
| The pauling electronegativity of M2                      | $\chi_{M2}$  |

|                                                          |              |
|----------------------------------------------------------|--------------|
| Unpaired d-electron number of M2                         | $N_{ied,M2}$ |
| The covalent radius of M2                                | $R_{COV,M2}$ |
| The number of outermost d electrons of M2                | $N_{d,M2}$   |
| The electron affinity of M2                              | $E_{A,M2}$   |
| The relative atomic mass of M2                           | $M_{M2}$     |
| The oxide formation enthalpy of M2                       | $H_{f,oxM2}$ |
| Average distance between M2 and the coordinating N atoms | $d_{M2-N}$   |
| $\chi_{M1} + \chi_{M2}$                                  | $\chi_{M+}$  |
| $\chi_{M1} - \chi_{M2}$                                  | $\chi_{M-}$  |
| $N_{ied,M1} + N_{ied,M2}$                                | $N_{ied,+}$  |
| $N_{ied,M1} - N_{ied,M2}$                                | $N_{ied,-}$  |
| $N_{d,M1} + N_{d,M2}$                                    | $N_{d,+}$    |
| $N_{d,M1} - N_{d,M2}$                                    | $N_{d,-}$    |

---

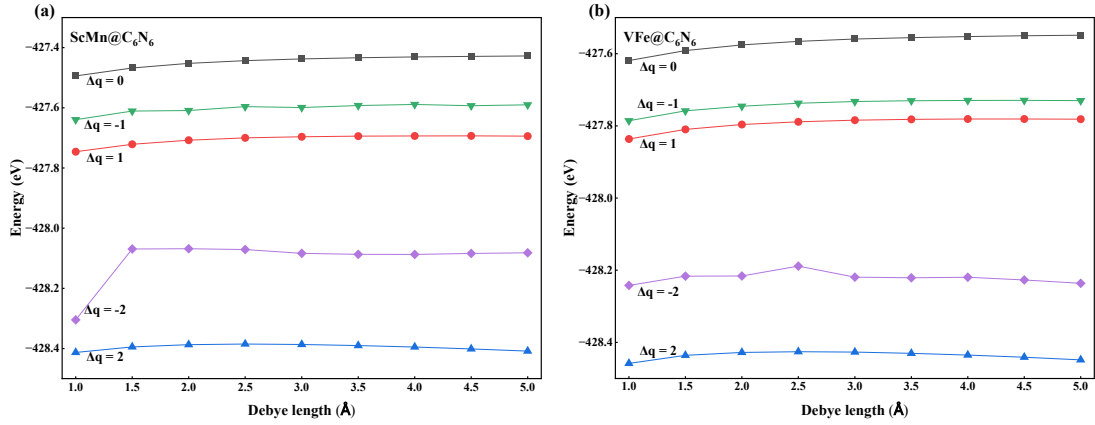

**Fig. S1** Convergence test of the Debye length

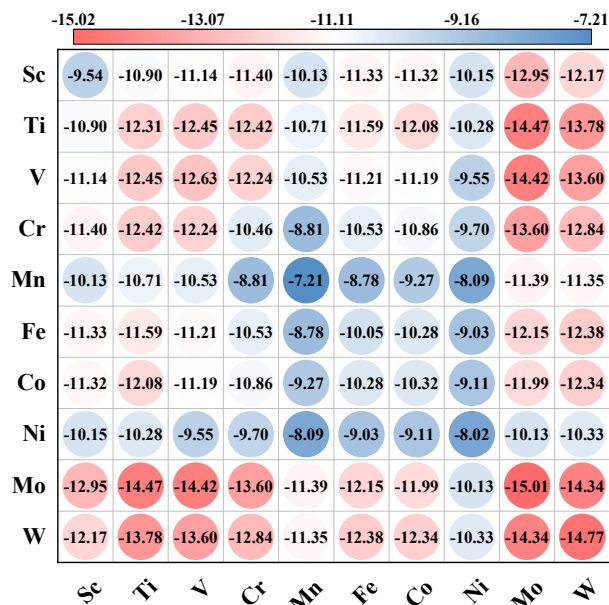

**Fig. S2** The heatmap of  $E_{bin}$  of M1M2@C<sub>6</sub>N<sub>6</sub>. the Gibbs free energy change of N<sub>2</sub> adsorption through end-on and side-on configurations on (b) TM@N<sub>4</sub>, (c) TM@S<sub>1</sub>N<sub>3</sub>, (d) TM@S<sub>2</sub>N<sub>2</sub>-PEN, (e) TM@S<sub>2</sub>N<sub>2</sub>-HEX, (f) TM@S<sub>2</sub>N<sub>2</sub>-OPP, (g) TM@S<sub>3</sub>N<sub>1</sub> and (h) TM@S<sub>4</sub>, respectively.

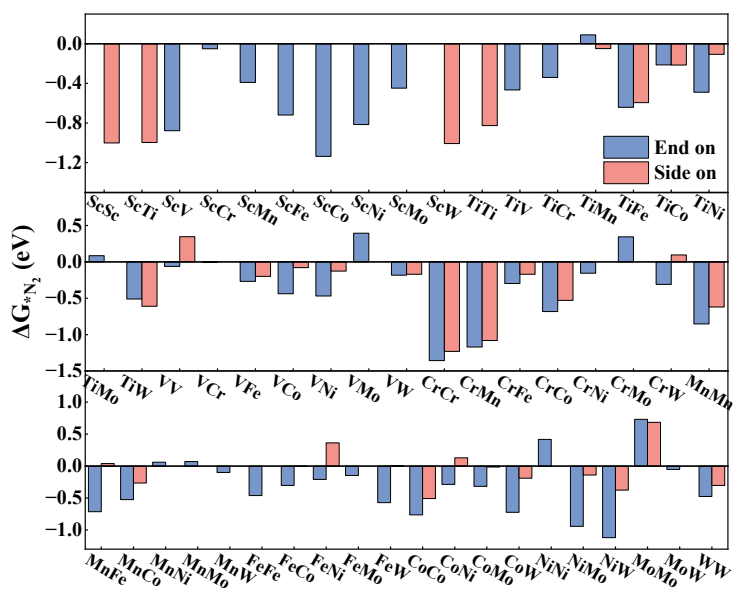

**Fig. S3** The Gibbs free energy change of N<sub>2</sub> adsorption through end-on and side-on configurations on M1M2@C<sub>6</sub>N<sub>6</sub>.

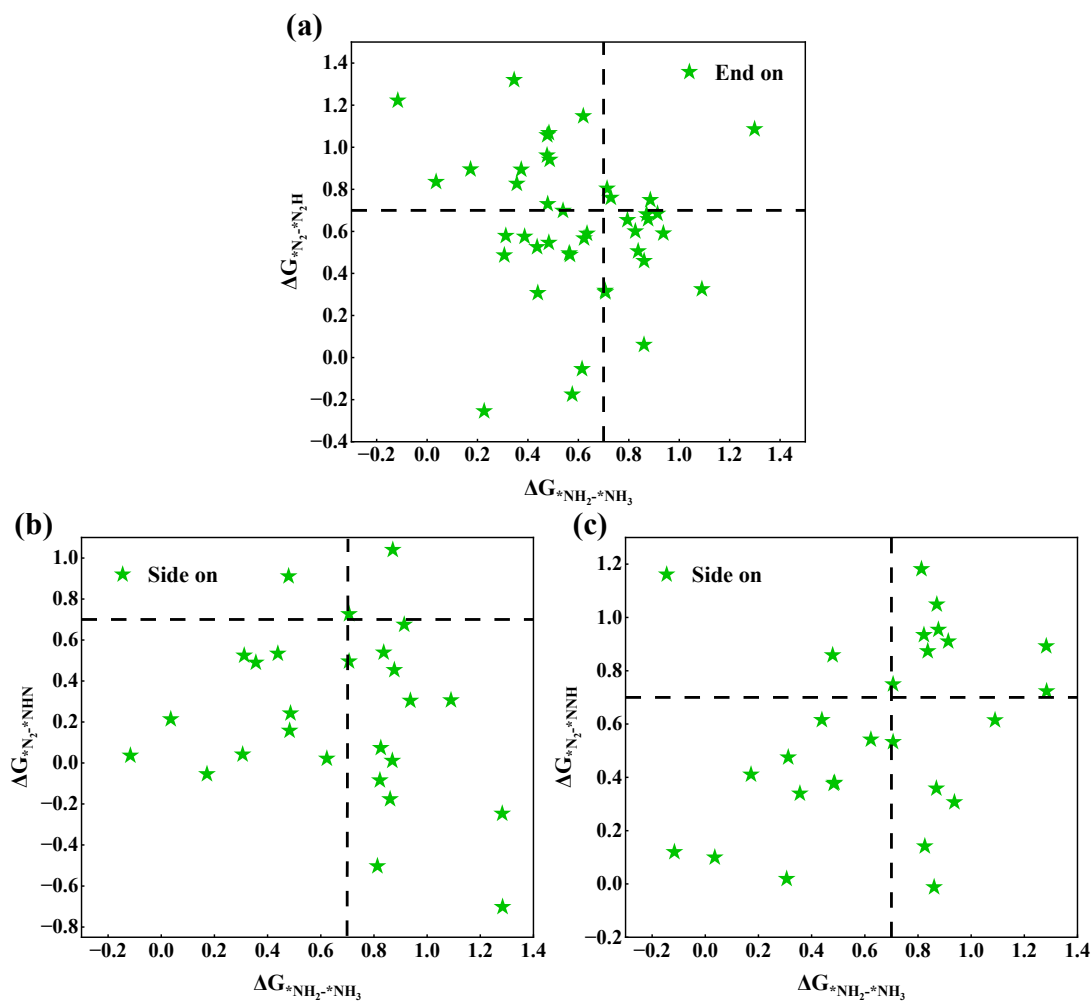

**Fig. S4** The Gibbs free energy for the first and last hydrogenation steps of M1M2@C<sub>6</sub>N<sub>6</sub>.

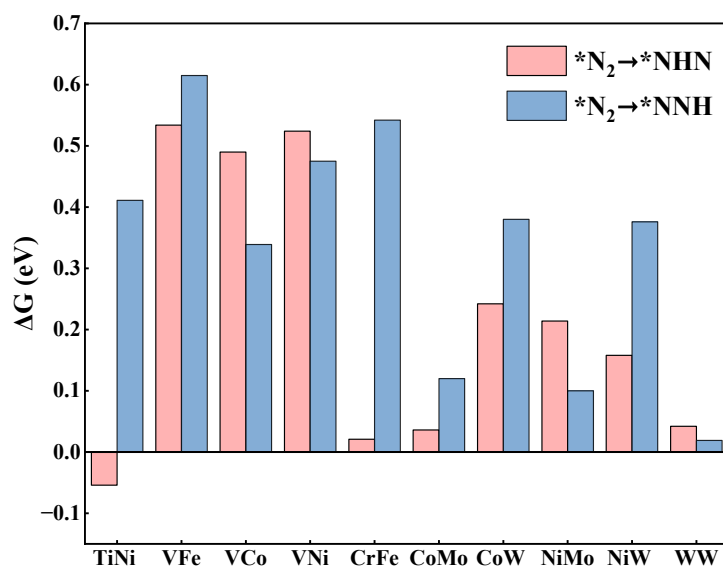

**Fig. S5** Comparison of hydrogenation free energies for 9 candidate catalysts meeting the screening criteria in side-on mode.

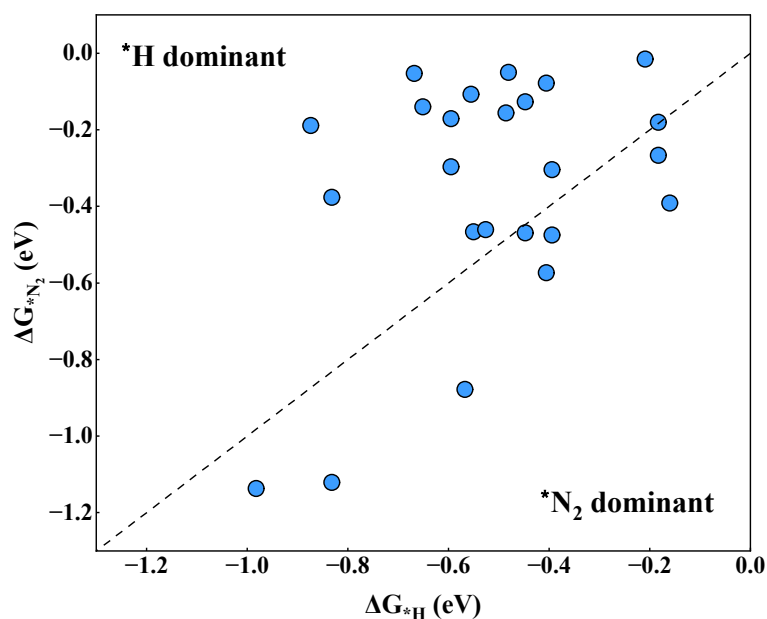

**Fig. S6** The competition of HER and NRR by comparing  $\Delta G_{*H}$  and  $\Delta G_{*N_2}$  to evaluate catalytic selectivity.

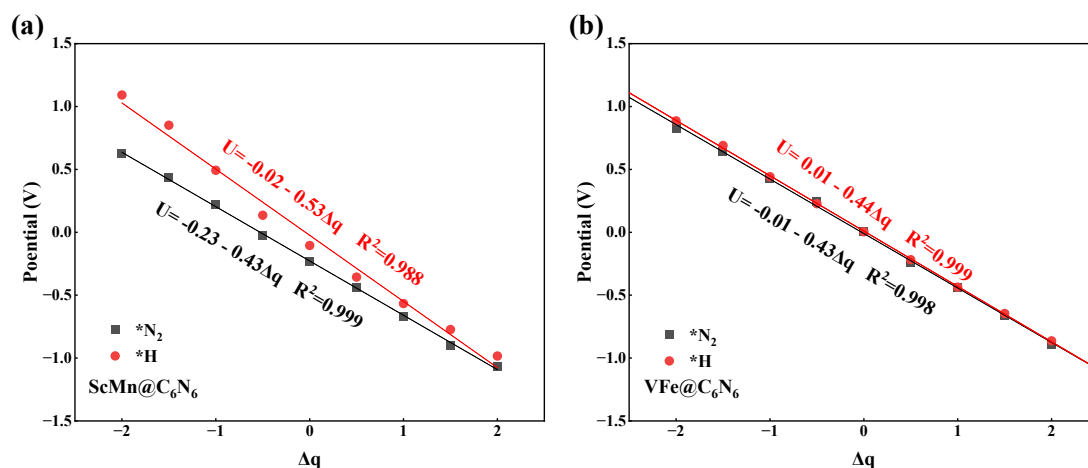

**Fig. S7** Relationship between applied potential and extra electrons for  $\text{ScMn@C}_6\text{N}_6$  and  $\text{VFe@C}_6\text{N}_6$ .

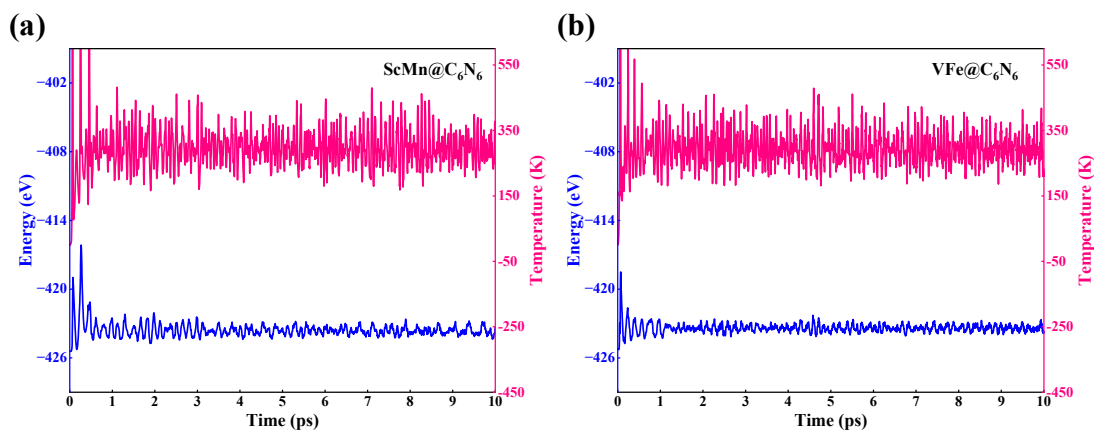

**Fig. S8** The variations of temperature and energy change with elapsed time of 10 ps at 300 K of (a)  $\text{ScMn@C}_6\text{N}_6$  and (b)  $\text{VFe@C}_6\text{N}_6$  during the AIMD simulation, respectively.

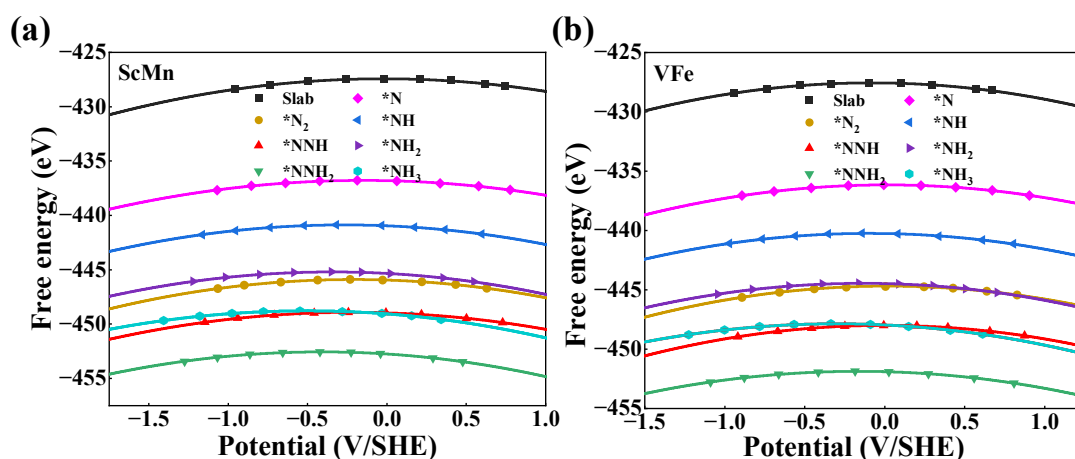

**Fig. S9** Calculated energies of the bare (a) ScMn, (b) VFe@C<sub>6</sub>N<sub>6</sub> and seven reaction intermediates as a function of different electrode potentials.

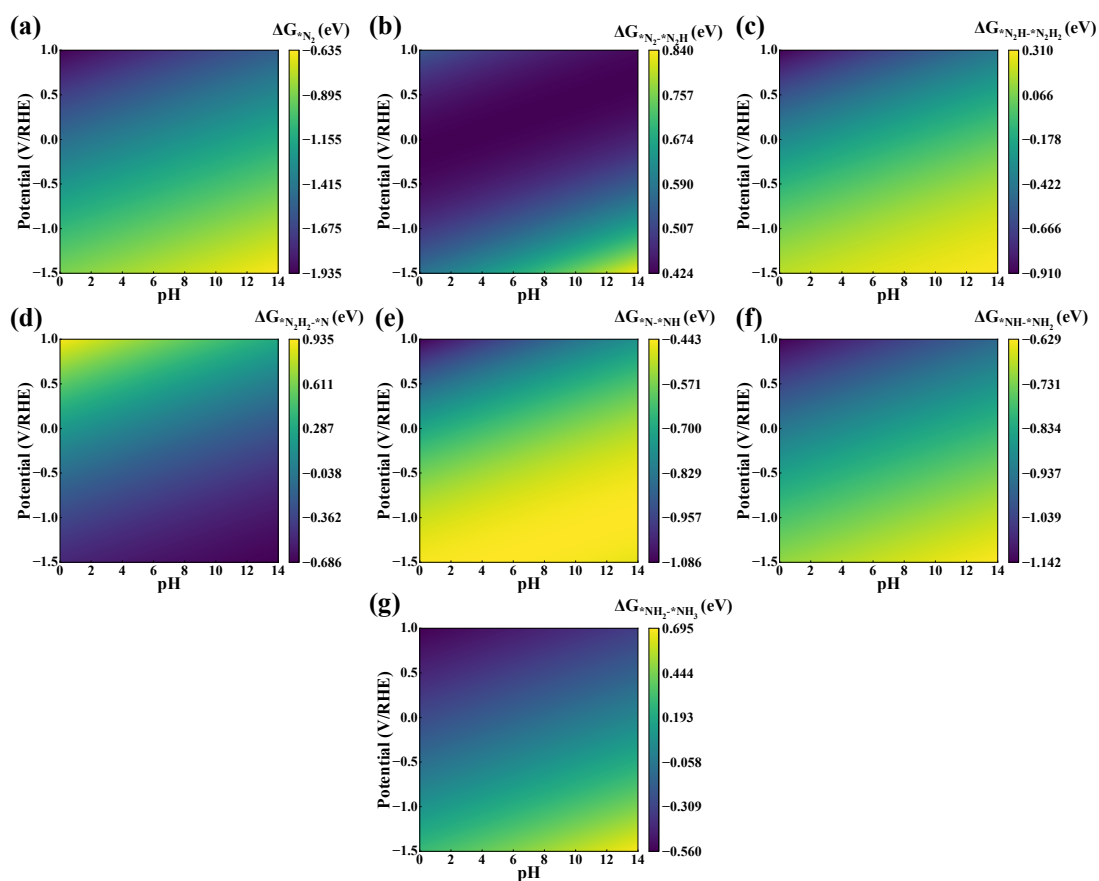

**Fig. S10** Contour maps of the reaction free energies for ScMn@C<sub>6</sub>N<sub>6</sub> as a function of pH values and applied potentials.

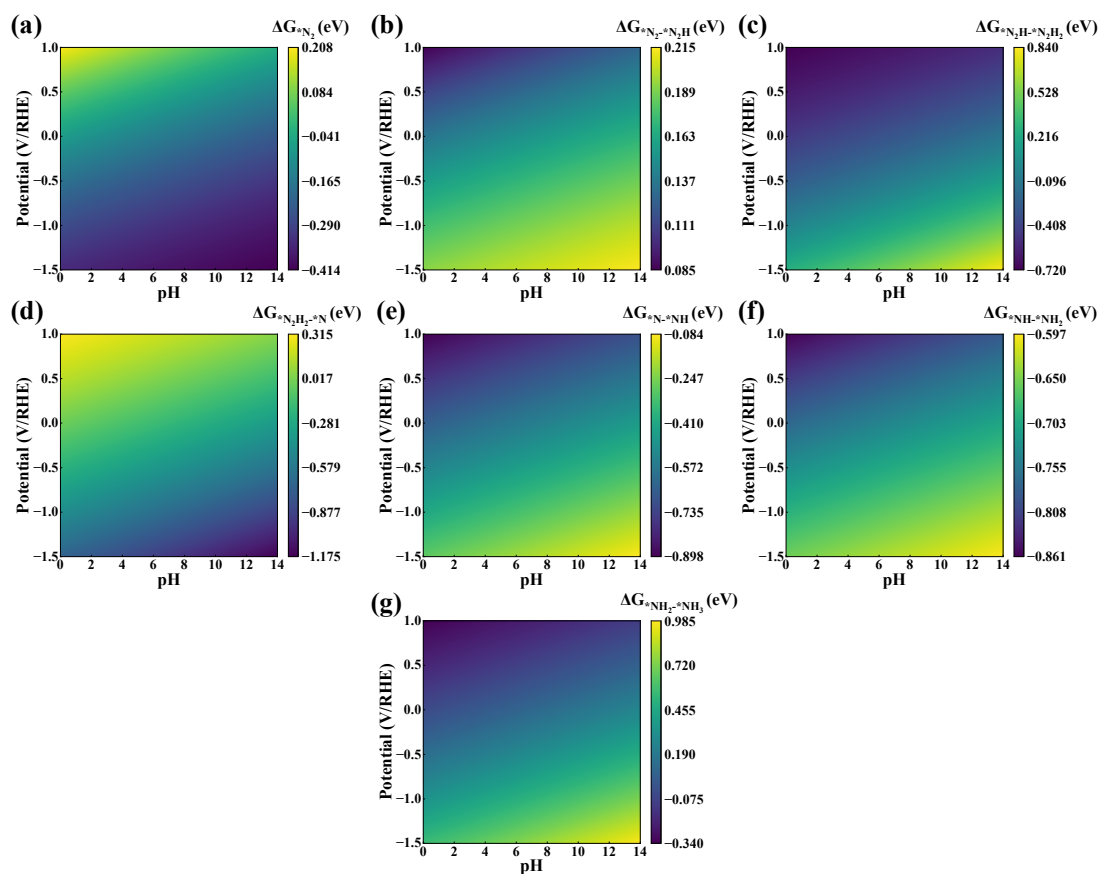

**Fig. S11** Contour maps of the reaction free energies for  $VFe@C_6N_6$  as a function of pH values and applied potentials.

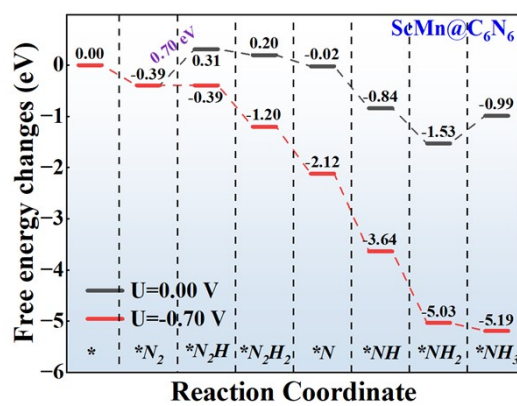

**Fig. S12** Gibbs free energy change diagram of  $ScMn@C_6N_6$  along the distal pathway under vacuum conditions.

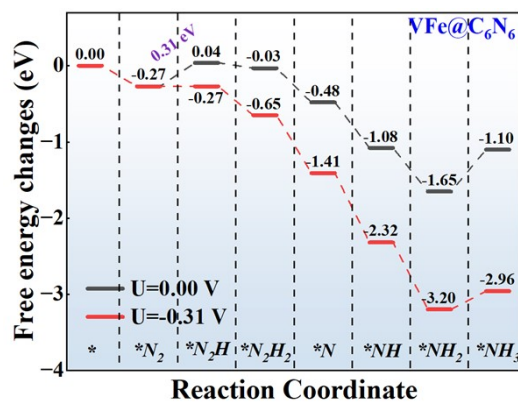

Fig. S13 Gibbs free energy change diagram of VFe@C<sub>6</sub>N<sub>6</sub> along the distal pathway under vacuum conditions.

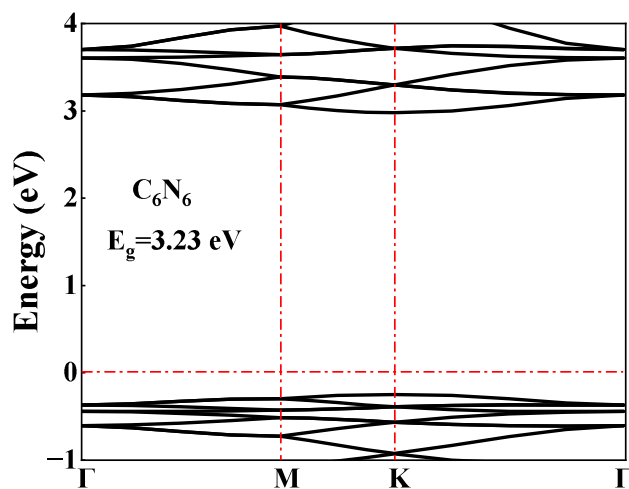

Fig. S14 The electronic band structure of C<sub>6</sub>N<sub>6</sub>.

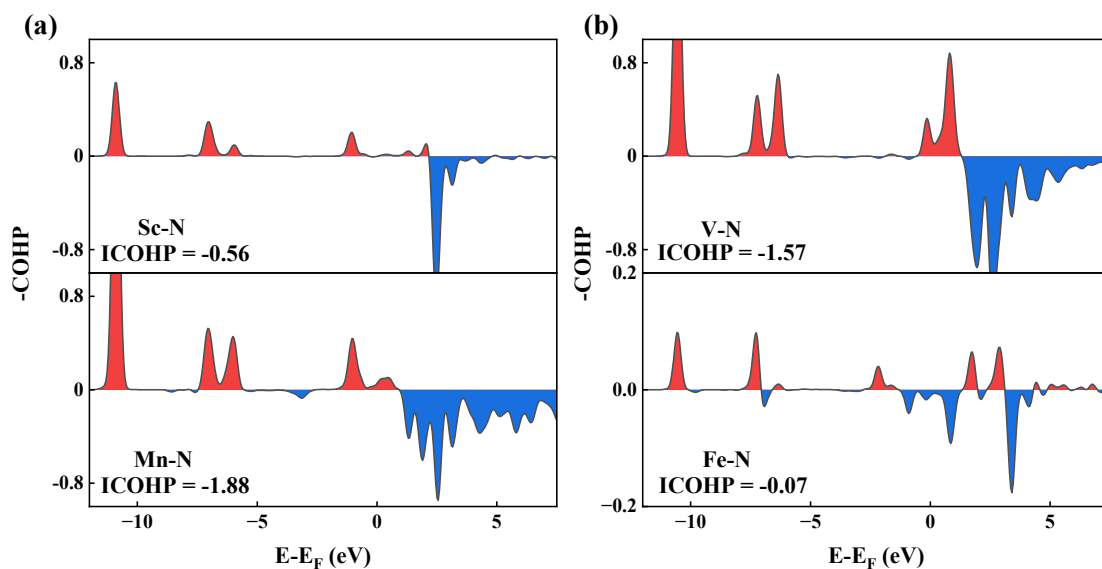

Fig. S15 The COHP of (a) ScMn@C<sub>6</sub>N<sub>6</sub> and (b) VFe@C<sub>6</sub>N<sub>6</sub>.

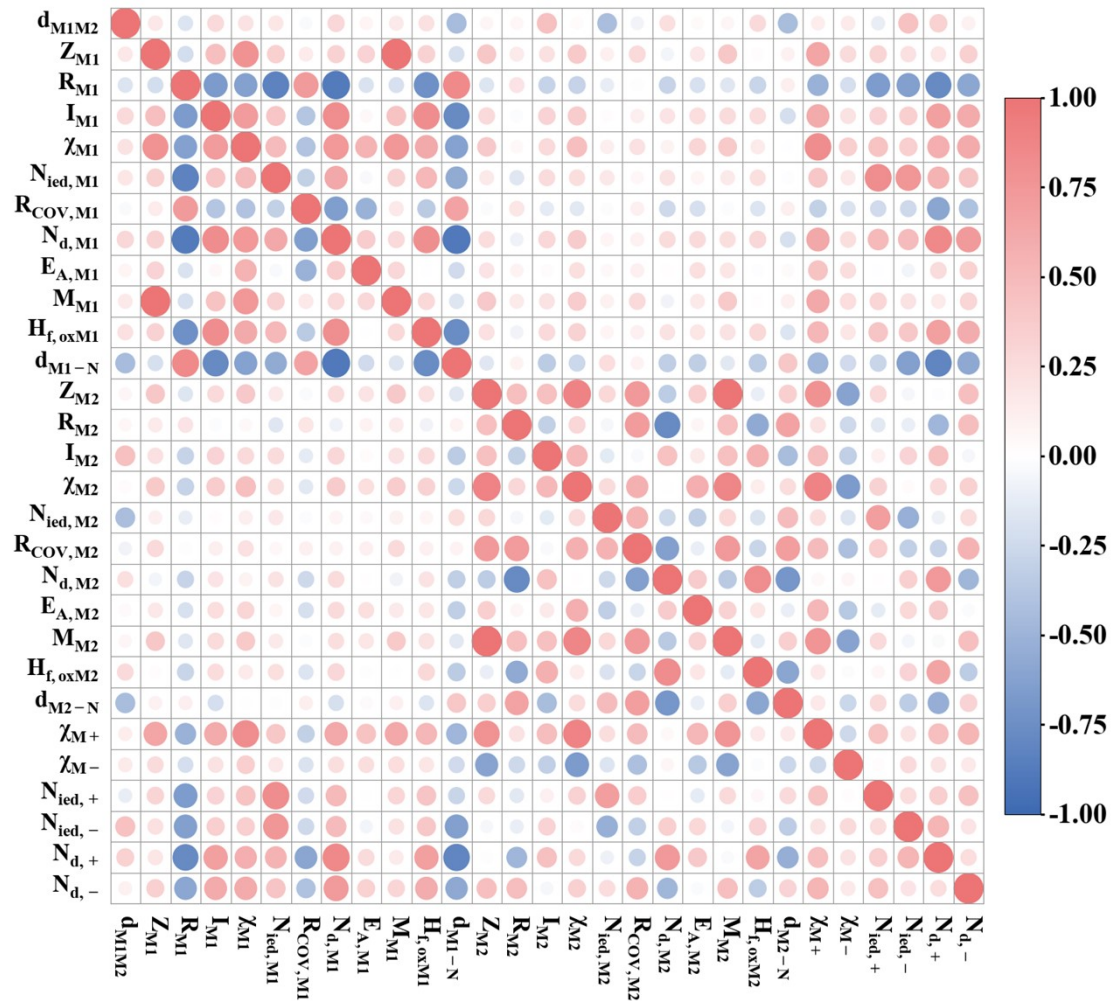

Fig. S16 Pearson correlation plots of raw feature set.

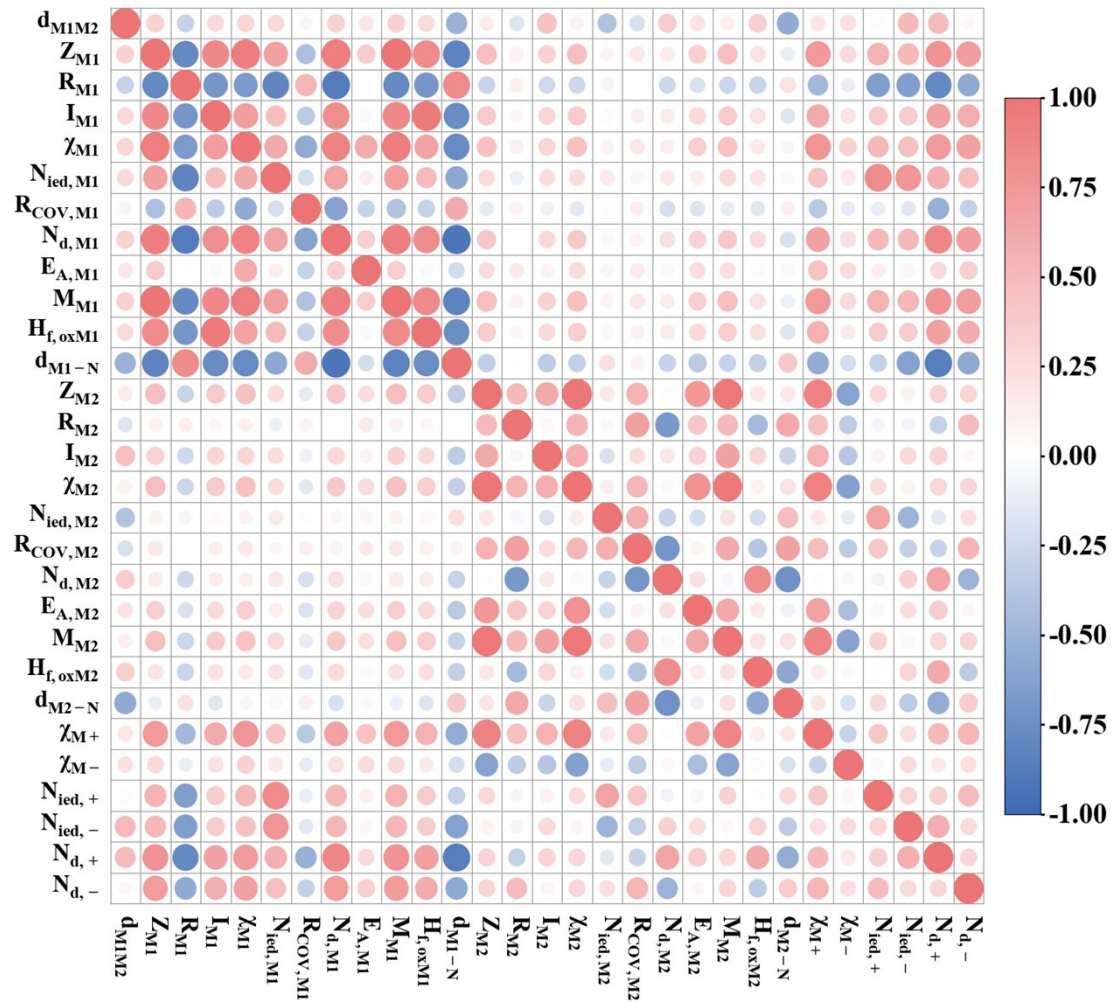

Fig. S17 Spearman correlation plots of raw feature set.

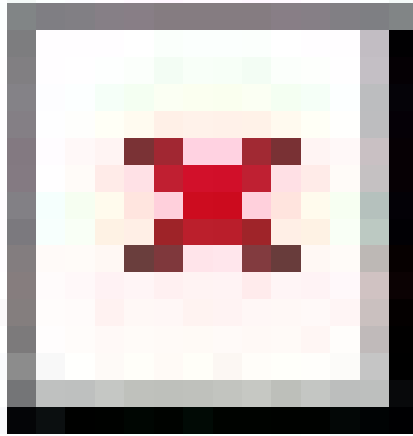

**Fig. S18** Pearson correlation plots of refined feature set.

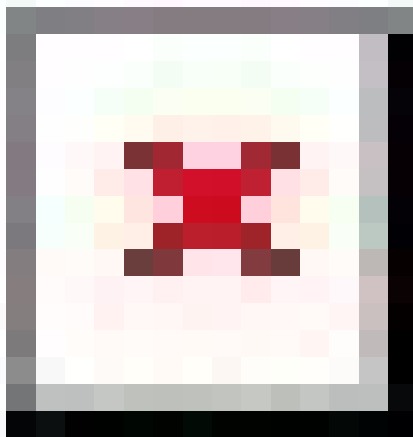

**Fig. S19** Spearman correlation plots of refined feature set.

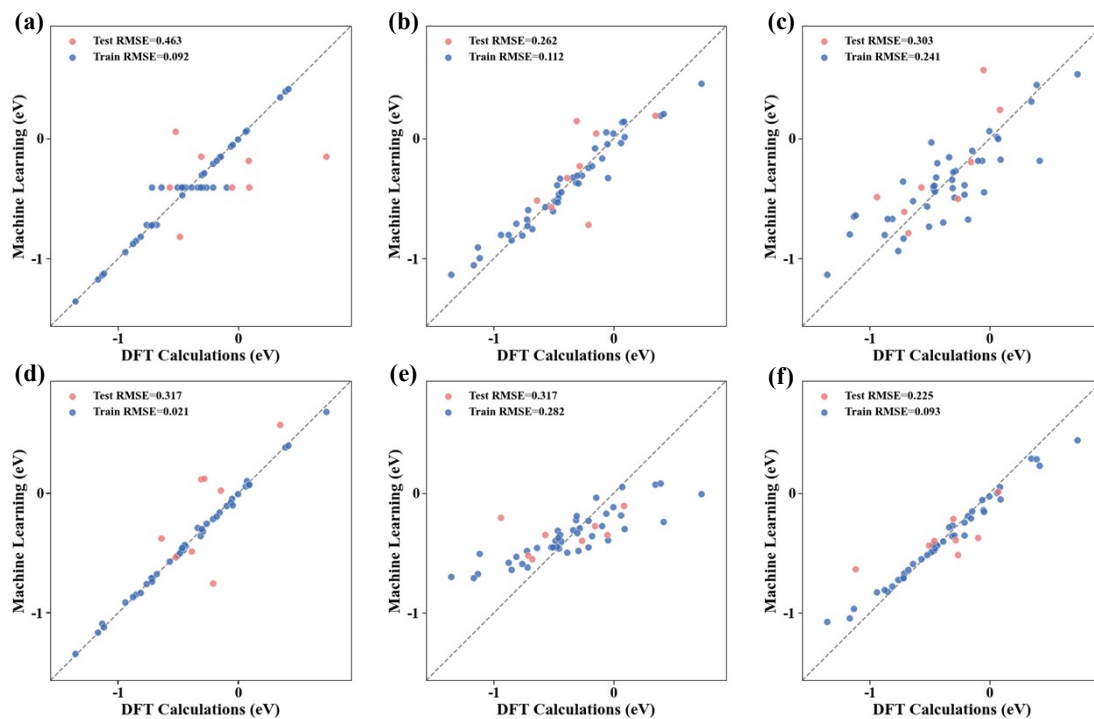

**Fig. S20** Comparison of the adsorption free energies of  $\Delta G_{*N_2}^{end}$  obtained by DFT and (a) DT, (b) LGBM, (c) RID, (d) MLP, (e) RF, (f) XGB model.

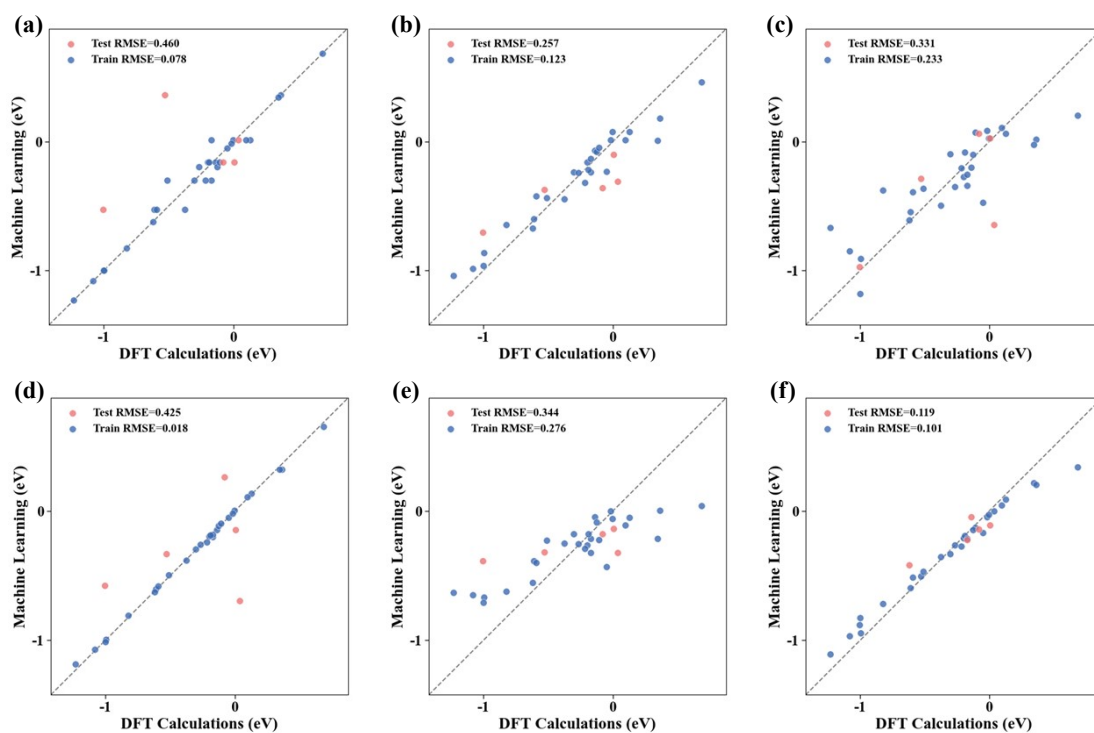

**Fig. S21** Comparison of the adsorption free energies of  $\Delta G_{*N_2}^{side}$  obtained by DFT and (a) DT, (b) LGBM, (c) RID, (d) MLP, (e) RF, (f) XGB model.

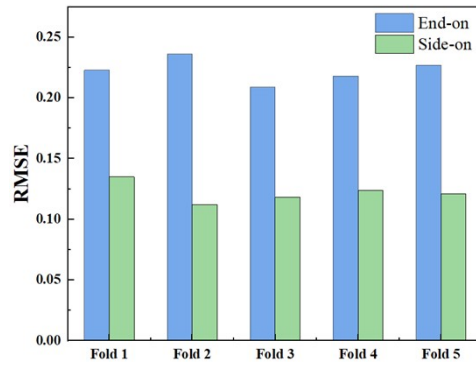

**Fig. S22** The assessment of generalization capability of the XGB model under 5-fold cross validation.
